# Supplementary material
Source: PubMed Central journal article supplement (PMC7808015)
Supplement: bloodBLD2020005770-suppl3.pdf [file bloodBLD2020005770-suppl3.pdf]

## 1 Supplemental Methods

### 3 **Organ collection and preparation**

4 *Spleen (BMT)*: Single-cell suspensions were obtained by mechanically disrupting harvested  
5 spleens and filtering through 70- $\mu$ m mesh filters (Thermo Fisher Scientific). Ammonium-  
6 chloride potassium (ACK) lysis was performed to remove erythrocytes prior to cell counting.

7 *Bone marrow (BMT)*: Cells were flushed from femur and tibia of donor mice and filtered  
8 through 70- $\mu$ m mesh filters. Erythrocytes were lysed using ACK.

9 *Blood*: Circulating immune cells were isolated from blood drawn via cardiac puncture and  
10 subsequently filtered and lysed as described above.

11 *Spleen and liver (downstream analysis)*: Mice were transcardially perfused with PBS, spleen and  
12 liver harvested and mechanically disrupted to generate single-cell suspensions. After filtering  
13 through 70  $\mu$ m mesh filters, erythrocytes were lysed before proceeding with downstream  
14 applications.

### 17 **Flow cytometry and fluorescence-activated cell sorting (FACS)**

18 One million to two million live spleen and liver cells were aliquoted for flow cytometry staining.  
19 For fluorescence-activated cell sorting (FACS) of splenocytes, samples from multiple mice were  
20 pooled for each cohort (syngeneic recipients and allogeneic recipients) and stained for CD4,  
21 CD1d, CCR7 and CD44. mCD1d (PBS-57) tetramer was obtained from the NIH Tetramer Core  
22 Facility to allow exclusion of NKT cells from CD4<sup>+</sup> T cells. Pooled samples for each cohort  
23 underwent FACS using BD Influx achieving 95% purity. FACS-purified samples were collected  
24 into PBS buffer containing 2% (v/v) BSA. Sorted T cell subsets were further processed for use in  
25 metabolomics analysis, extracellular flux analysis and RNA-sequencing as described below. For  
26 the analysis of glycolytic enzymes, cells isolated from spleen and liver were first stained for  
27 CD45, CD3, CD4, CD8a, CD69, CCR7 and CD44 and subsequently fixed and permeabilized and  
28 stained for the intracellular antigens FoxP3, GAPDH, GLUT1 and HK2 or their respective  
29 isotype control. Individual mouse sample flow cytometry measurements were obtained on a BD  
30 LSR II or Fortessa (Becton Dickinson, USA), and analyzed using FlowJo Software (Becton  
31 Dickinson, USA). A list of antibodies is provided in Table 1.

32 *Supplementary Table 1: Flow cytometry antibodies*

| <u>Antigen</u> | <u>Clone</u>  | <u>Manufacturer</u>         |
|----------------|---------------|-----------------------------|
| CD45           | 30-F11        | Biolegend                   |
| CD3            | 17A2          | Biolegend                   |
| CD4            | GK1.5         | eBioscience                 |
| CD8a           | 5H10 / 53-6.7 | Invitrogen / BD Biosciences |
| CD69           | H1.2F3        | Biolegend                   |
| CD44           | IM7           | Biolegend                   |
| CCR7 (CD197)   | 4B12          | BD Biosciences              |
| CD19           | 6D5           | Biolegend                   |
| CD11b          | M1/70         | Biolegend                   |
| Ly6G           | 1A8           | Biolegend                   |
| Ly6C           | HK1.4         | Biolegend                   |

|                              |                |                            |
|------------------------------|----------------|----------------------------|
| FoxP3                        | FJK-16s        | eBioscience                |
| GAPDH                        | 14C10          | Cell Signaling Technology  |
| Rabbit IgG isotype           | DA1E           | Cell Signaling Technology  |
| GLUT1                        | EPR3915        | Abcam                      |
| Rabbit IgG isotype           | EPR25A         | Abcam                      |
| HK2                          | OTI4C5         | Novus Biologicals          |
| Mouse IgG isotype            | 11711          | Novus Biologicals          |
| CD1d                         | PBS57 tetramer | NIH Tetramer Core facility |
| CD16/32 (Fc block)           | 2.4G2          | BD Biosciences             |
| Live/Dead Aqua viability dye |                | Invitrogen                 |

34

### 35 **Mass spectrometry analysis of intracellular metabolites**

36 Sorted splenic CD4<sup>+</sup> T cell subsets were centrifuged (~314 x g, 5 min, room temperature  
37 (RT)), the supernatant was discarded, and the pellet was resuspended in 10 mL aqueous mannitol  
38 (5%, w/v) by gentle mixing. The cell suspension was centrifuged (~314 x g, 5 min, RT) and the  
39 supernatant (aqueous mannitol) was discarded. The pellet was then resuspended in deionized  
40 water (50 µL) and centrifugation (~314 x g, 5 min, RT) was repeated. Approximately 100-150  
41 µL of the supernatant was discarded followed by addition of 133.3 µL methanol (mixed for 30  
42 sec) to quench intracellular enzymes. The working internal standard solution (10 µM) used for  
43 mass spectrometry (MS) analysis was added (91.7 µL), mixed for 30 sec and samples were  
44 stored at -80 °C. The processed T cell samples were pooled and quantified relatively utilizing  
45 capillary electrophoresis time-of-flight mass spectrometry (CE-TOF-MS, Agilent  
46 Technologies, Waldbronn, Germany) with analysis performed by Human Metabolome  
47 Technologies, Inc. (HMT, Japan). The samples were thawed, combined, vortexed and 1,100 µL  
48 was transferred to a 1.5 mL microcentrifuge tube and centrifuged (2,300 x g, 5 min, 4 °C). Two  
49 ~500 µL aliquots were transferred to 5 kDa MWCO centrifugal filter units (0.5 mL, Millipore  
50 Sigma, Burlington, MA, USA) and centrifuged (9,100 x g, 4 °C) until sample filtration was  
51 complete (~2-5 hrs.). The sample filtrates were transferred to 1.5 mL polypropylene  
52 microcentrifuge tubes and vacuum dried to completeness at room temperature using a Savant  
53 DNA 110 Speed Vac<sup>®</sup> (Savant Instruments, Inc., Farmingdale, NY, USA). The sample residue  
54 containing ~ 3 million T cells for MS analysis was capped and stored at -80 °C. After shipment  
55 to HMT, the sample residues were reconstituted with 50 µL deionized water, mixed and  
56 ~100 nL injected for CE-TOF-MS analysis.

57

### 58 **Metabolic flux assay**

59 Mitochondrial function and glycolysis were evaluated using a Seahorse XFe96 Bioanalyzer  
60 (Agilent) per the manufacturer instructions. Subsets of CD4<sup>+</sup> T cells from the spleen were  
61 FACS-purified and plated into 96-well plates coated with CellTak (Corning, #354240) with  
62 a seeding density of 100,000 live cells per well and a minimum of 8 wells per cell  
63 subset. Oligomycin (1 µM), 2-[[4-(trifluoromethoxy)phenyl]hydrazinylidene]propanedinitrile  
64 (FCCP, 0.5 µM) and Rotenone/antimycin (1 µM/ 1 µM) were loaded into the injection ports,  
65 injected as indicated in the figures and used to measure the oxygen consumption rate and  
66 extracellular acidification rate with a total plate run time of up to 140 minutes.

67

### 68 **Lactic acid measurement**

69 Mouse plasma L-lactate levels were quantified via mass spectrometry in mandibular blood  
70 samples at indicated timepoints. For quantitatively measuring L-lactic acid levels in mouse  
71 plasma, we used a Waters Acquity H-Class UPLC system coupled to a Waters Xevo ESI-  
72 MS/MS. As mouse blood volume is limited, we developed a MS method that utilized only 25 to  
73 50  $\mu$ L of mouse plasma, which was collected using a fluoride/oxalate microtainer tube. Briefly,  
74 the mouse plasma and internal standard (D3-lactic acid) were added to a 3K MWCO filter  
75 (Amicon<sup>®</sup>, 0.5 mL) and centrifuged (14,000 x g, 30 min, 20 °C). The filtrate was transferred to a  
76 Waters autosampler microvial (deactivated) and 2  $\mu$ L was injected for MS analysis. The 3K  
77 MWCO filter provided clean extracts for UPLC HILIC chromatography and the electrospray  
78 ionization ESI (-) SIR (selected ion recording) mode of MS analysis. For HILIC plasma  
79 component separation, we used a linear gradient consisting of aqueous ammonium acetate  
80 (26 mM) and acetonitrile, flow rate of 0.3 mL/min, and column temperature of 30 °C. The  
81 HILIC chromatography provided good resolution of the plasma components and excellent peak  
82 shape for L-lactic acid and the internal standard. The quantitative SIR MS method utilized five  
83 calibration standards (L-lactic acid, 0.28-5.6 mM) and a deuterated internal standard (D3-lactic  
84 acid, 1.1 mM). The UPLC-ESI (-) SIR-MS method demonstrated good sensitivity (MS  
85 response), specificity and linearity using a quadratic fit calibration model for quantifying L-lactic  
86 acid.

87

### 88 **RNA extraction and quantification**

89 RNA was extracted from sorted spleen CD4<sup>+</sup> T subset populations using the RNeasy<sup>®</sup> Plus Mini  
90 Kit following the manufacturers protocol for purification of total RNA from animal cells  
91 (Qiagen). In brief, the cells were lysed in Buffer RLT Plus with  $\beta$ -ME, homogenized with  
92 a QIAshredder spin column, and the resultant lysate was run through a gDNA Eliminator spin  
93 column to remove genomic DNA. RNA was extracted by passing the remaining lysate through a  
94 RNeasy spin column and, following washes, total RNA was resuspended in 30  $\mu$ l of RNase-free  
95 water. Measurement of RNA concentration and quality control was performed using a 2100  
96 Bioanalyzer instrument with the standard manufacturers protocol (Agilent).

97

### 98 **Bulk RNA Library and Sequencing Method**

99 RNA-Seq libraries were constructed from 0.1-0.6  $\mu$ g total RNA. The HyperPrep RNA-Seq Kit  
100 with Riboerese (Kapa Biosystems/Roche) was used according to manufacturer's instructions to  
101 deplete rRNA and then construct libraries for sequencing on Illumina platforms. Amplification  
102 was performed using 10 or 12 cycles which was optimized for the input amounts and to  
103 minimize the chance of over-amplification. Unique barcode adapters were applied to each  
104 library. Libraries were pooled in equimolar ratio for sequencing. The pooled libraries were  
105 sequenced on multiple lanes of a HiSeq 4000 to achieve a minimum of 65 million 75 base read  
106 pairs. The data was processed using RTA version 1.18.54 and CASAVA 1.8.2.

107

### 108 **Bulk RNA sequencing**

109 RNA-seq NGS-datasets were processed using the CCBP Pipeliner utility (<https://github.com/CCBR/Pipeliner>). Briefly, reads were trimmed of low-quality bases and adapter sequences were  
110 removed using Trimmomatic v0.33<sup>1</sup>. Mapping of reads to the Gencode mm10 mouse reference  
111 genome (M12 release) was performed using STAR v2.5.2b in 2-pass mode<sup>2</sup>. Then, RSEM v1.3.0  
112 was used to quantify gene-level expression, with counts normalized to library size as counts-  
113 per-million<sup>3</sup>. Finally, limma-voom v3.34.5 was used for quantile normalization and differential  
114

115 expression<sup>4</sup>. Data for the mitochondrial genome-encoded genes for the electron transport chain  
 116 were not evaluated and the genes for complex II (succinate dehydrogenase) were selected as part  
 117 of the Krebs cycle genes. Sequencing data are available under GEO accession number  
 118 GSE147371.

119  
 120

121 **Single cell RNA sequencing (scRNAseq)**

122

123 *Mouse scRNAseq*

124

125 Murine lymphocytes were isolated from the liver of three syngeneic and three allogeneic on day  
 126 14 after bone marrow transplantation as described above. Cells were stained for CD45 and CD4  
 127 and CD45<sup>+</sup> CD4<sup>+</sup> cells were sorted into PBS supplemented with 1% BSA. Viability for all  
 128 samples was >82%. To profile the 5' single cell gene expression, single cell suspensions were  
 129 then loaded onto a Chromium Single Cell Chip (10X Genomics) with a recovery target of 6,000  
 130 cells per lane according to the manufacturer's instructions. All subsequent steps of cDNA  
 131 generation, library preparation and quality control were performed according to the 10X  
 132 Genomics 5' single cell user guide. Four NextSeq runs and one MiSeq run were performed and  
 133 the standard 10X Genomics cellranger (version 3.0.2) pipeline was used to extract Fastq's and  
 134 10X Genomics cellranger (version 3.0.2) pipeline was used to perform data processing.  
 135 Sequenced reads were aligned to the 10X Genomics provided Mouse mm10 reference sequence  
 136 (refdata-cellranger-mm10-3.0.0). Sequencing data are available under GEO accession number  
 137 GSE153591.

138  
 139

*Supplementary Table 2: Mouse scRNAseq output metrics summary*

| Sample | Estimated Number of Cells | Mean Reads per Cell | Median Genes per Cell | Sequencing Saturation | Total Genes Detected | Median UMI Counts per Cell |
|--------|---------------------------|---------------------|-----------------------|-----------------------|----------------------|----------------------------|
| syn1   | 5,396                     | 41,046              | 1,957                 | 74.20%                | 17,534               | 5,179                      |
| syn2   | 5,456                     | 45,761              | 1,937                 | 78.40%                | 17,299               | 5,263                      |
| syn3   | 4,751                     | 40,256              | 2,075                 | 73.80%                | 17,137               | 5,624                      |
| allo1  | 6,226                     | 45,438              | 2,178                 | 70.80%                | 17,219               | 6,469                      |
| allo2  | 5,744                     | 47,044              | 2,210                 | 71.30%                | 16,989               | 6,438                      |
| allo3  | 5,894                     | 46,882              | 2,079                 | 73.40%                | 16,953               | 5,950                      |

140

141 Seurat (v3.1.1) was used for the downstream analysis following the vignette for the analysis of  
 142 an integrated dataset<sup>5</sup>. Briefly, syngeneic and allogeneic replicates were first merged and filtered  
 143 for cells containing at least 200 and less than 4500 features as well as a mitochondrial gene  
 144 content of less than 5%. Samples were normalized and variable genes identified using the  
 145 FindVariableFeatures function with nfeatures limited to 2000. Both samples were integrated,  
 146 scaled and principal components were calculated. Clustering was performed using Uniform  
 147 Manifold Approximation and Projection (UMAP) with the first 20 dimensions and a resolution  
 148 of 0.5. Conserved markers between each cluster for both samples were identified using the  
 149 FindConservedMarker function. Differentially expressed genes between syngeneic and  
 150 allogeneic cells were calculated using the FindMarker function. Module scores were calculated

151 using the AddModuleScore function using pre-defined gene sets of interest as indicated in  
 152 Supplementary Table 3.

153  
 154

Supplementary Table 3: Module gene sets

| Module       | Genes                                                                                                                                                                                                                                                                                                                                                                                                                                                                                                                                                                                                                                                                                                                                                                                                                                                                                                                                                                                                                                                                                                                                                                  |
|--------------|------------------------------------------------------------------------------------------------------------------------------------------------------------------------------------------------------------------------------------------------------------------------------------------------------------------------------------------------------------------------------------------------------------------------------------------------------------------------------------------------------------------------------------------------------------------------------------------------------------------------------------------------------------------------------------------------------------------------------------------------------------------------------------------------------------------------------------------------------------------------------------------------------------------------------------------------------------------------------------------------------------------------------------------------------------------------------------------------------------------------------------------------------------------------|
| Glycolysis   | Slc2a1, Slc2a3, Hk1, Hk2, Gpi1, Pfkfb, Aldoa, Tpi1, Gapdh, Pglk1, Pgm1, Eno1, Pkm, Ldha, Slc16a1, Slc16a3                                                                                                                                                                                                                                                                                                                                                                                                                                                                                                                                                                                                                                                                                                                                                                                                                                                                                                                                                                                                                                                              |
| TCA          | Cs, Aco2, Idh2, Ogdh, Sucla2, Suclg1, Sdha, Sdhb, Sdhc, Sdhd, Fh1, Mdh2                                                                                                                                                                                                                                                                                                                                                                                                                                                                                                                                                                                                                                                                                                                                                                                                                                                                                                                                                                                                                                                                                                |
| Th1*         | 4930453N24Rik, Abracl, Acot7, Actb, Actg1, Actr3, Adgre5, Agpat4, Ahnak, Anxa1, Anxa2, Anxa5, Anxa6, Ap2s1, Aprt, Arhgdib, Arl6ip5, Arpc5, Atp1a1, Atp5c1, Atp5h, Atp5l, AW112010, Bhlhe40, Calm1, Capzb, Ccl5, Ccr2, Cd2, Cd47, Cd48, Cd52, Cdc42, Cdc42ep3, Cfl1, Clic1, Clta, Coro1a, Cox17, Cox5a, Cox5b, Crip1, Crot, Ctla2a, Ctsc, Ctsd, Ctsw, Cxcr6, Cyba, Cyth4, Dnajc15, Dok2, Ech1, Emp3, Eno1, Epsti1, Esyt1, Fam107b, Gabarapl2, Gapdh, Gbp7, Ggh, Gimap7, Glipr2, Glrx, Gm4950, Gmfg, Gna15, Gramd3, Gzmb, H2afy, H2afz, Hmgb2, Hsp90b1, Id2, Idh3a, Ifngr1, Il18r1, Il18rap, Il2rb, Itga4, Itgb2, Itgb7, Klrc1, Krtcap2, Lfng, Lgals1, Lgals3, Lsp1, Ly6c2, Mrpl33, Ms4a4b, Ms4a6b, Mtpn, Myl12a, Myl6, Myo1f, Myo1g, Ndufb7, Nkg7, Nptn, Ostf1, Pglyrp1, Plac8, Plek, Podnl1, Ppib, Ppp1ca, Ppp3ca, Preli1, Psm3, Pycard, Rap1b, Rasgrp2, Rbm3, Reep5, Rnf138, Rnf166, Rora, Rpa2, Runx3, S100a10, S100a11, S100a13, S100a4, S100a6, S1pr4, Sec61b, Sec61g, Selplg, Sept11, Serpinb6b, Serpinb9, Sh3bgr13, Slamf1, Sms, Spn, St3gal6, Stmn1, Sub1, Tagln2, Taldo1, Tbx21, Tceb2, Thy1, Tmed2, Tmsb4x, Tpm4, Tpst2, Tspo, Txn1, Txndc5, Ube2g2, Vim, Zyx |
| Th2          | Il4ra, Icos, Maf, Nfatc1, Gfi1, Gata3, Cebpb, Irf4, Stat6, Ccl5, Asb2, Jak1, Il13, Nfatc2ip, Il4, Ccr3, Irf8, Tmed1, Ccr4, Stat5a, Pparg, Il13ra1                                                                                                                                                                                                                                                                                                                                                                                                                                                                                                                                                                                                                                                                                                                                                                                                                                                                                                                                                                                                                      |
| Dysfunction* | 2010111I01Rik, Arl6ip1, AW112010, Bhlhe40, Ccl3, Ccl4, Ccl5, Ccr5, Cd160, Cd27, Cd3g, Cd7, Cst7, Ctla2a, Ctla4, Ctsb, Ctsw, Cxcr6, Cyba, Dnaj1, Efh2, Fas1, Fyn, Gadd45b, Gimap7, Gpr65, Gzmk, H2-K1, Hspa1a, Hspa8, Hsph1, Id2, Lag3, Lill4b, Nkg7, Nr4a2, Pdcd1, Plac8, Psm10, Psm8, Rgs1, Rnaset2b, Samsn1, Serpina3g, Sh2d2a, Shisa5, Slamf7, Sub1, Tapbpl, Tnfrsf1b, Traf4, Ubb                                                                                                                                                                                                                                                                                                                                                                                                                                                                                                                                                                                                                                                                                                                                                                                   |
| Tcm*         | 1810058I24Rik, Ablim1, Acot7, Acp5, Actn1, Adgre5, Adk, Ahnak, Anp32a, Anxa2, Arl5c, Atp1b3, Atp2b1, Bcl2, Bin2, Ccdc28b, Ccr7, Cd9, Cdc25b, Cdc42se1, Cdkn2d, Crip1, Crip2, Dock2, Emb, Ezr, Fam177a, Fam65b, Glud1, Hint1, Id3, Il6ra, Iqgap1, Itgb1, Itpkb, Jun, Klf2, Klf3, Klf6, mt-Co1, Pbxip1, Pdlim1, Prr13, Psm6, Raf1, Rasa3, Rasgrp2, Rora, Rpa1, S100a10, S100a11, S100a4, S100a6, Sfr1, Slamf6, Spn, Srpk1, Stk24, Stk38, Tagap, Tagln2, Tcf7, Tcp112, Tspan13, Tuba1a, Vim, Vsir, Xrn2                                                                                                                                                                                                                                                                                                                                                                                                                                                                                                                                                                                                                                                                   |
| Tfh*         | 2310001H17Rik, Aldoa, Angptl2, Asap1, Batf, BC021614, Bcl2a1b, Borcs8, Cd160, Cd200, Cd3g, Cd82, Cox14, Ctsb, Cxcr5, Ddit4, Dennd2d, Eea1, Fam162a, Fyn, Gapdh, Gdi2, Gimap5, Gna13, Gng2, Hif1a, Hmgb1, Icos, Ifi2712a, Lsg15, Izumo1r, Limd2, Lpp, Lrmp, Maf, Marcks11, Matk, Mif, Mmd, Nsg2, Nt5e, P2rx7, Pdcd1, Pfk1, Pfkfb, Pgam1, Pkm, Ppp1r14b, Prkca, Ptp4a2, Ptpn11, Ptprcap, Ptrh1, Rab37, Rgs10, Rnaset2a, Rnaset2b, Rpsa, Scd2, 44081, Sh2d1a, Smco4, Sostdc1, Tbc1d4, Tnfaip8, Tnfsf8, Tox, Tox2, Tpi1, Trim8, Zap70, Zfp3611                                                                                                                                                                                                                                                                                                                                                                                                                                                                                                                                                                                                                             |

|       |                                                                                                                                                                   |
|-------|-------------------------------------------------------------------------------------------------------------------------------------------------------------------|
| Treg* | Bmyc,Btg1,Capg,Ccnd2,Cd2,Cd74,Ctla4,Foxp3,Gbp7,Gimap7,Gpx4,H2-T22,Ifngr1,Ikzf2,Ii7r,Izumo1r,Ltb,Mbnl1,Peli1,Rgs1,Samsn1,Sdf4,Sell,Serinc3,Shisa5,Tnfrsf18,Tnfrsf4 |
| *     | Gene sets defined by Ciucci et al. <sup>6</sup>                                                                                                                   |

155

156 *Human scRNAseq patient characteristics*

157 We screened annotated clinical data from a GvHD clinical study performed at the NIH Clinical  
 158 Center (NCT00520130). Two patients that matched our criteria were identified. One patient  
 159 (“pre-GvHD”) received an 7/8 matched unrelated donor (MUD) peripheral blood hematopoietic  
 160 stem cell transplant (PBHSCT) for CML in remission. The other (“No GvHD”) received an 8/8  
 161 MUD PBHSCT for relapsed mantle cell lymphoma in remission. Both patients received reduced  
 162 intensity conditioning with fludarabine and cyclophosphamide and were receiving methotrexate,  
 163 tacrolimus and sirolimus for GvHD prophylaxis at the time of PBMC collection. The blood  
 164 samples for both patients were collected on post-transplant day +30. The patient “pre-GvHD”  
 165 developed an erythematous rash and nausea on post-transplant day +35, with upper GI biopsy on  
 166 day +37 consistent with GvHD, i.e. epithelial apoptosis in the duodenum, stomach antrum and  
 167 body (CMV and *H.pylori* negative). Patient “No GvHD” did not have symptoms of acute GvHD,  
 168 but did have ongoing CMV retinitis that preceded HSCT and for which systemic anti-virals had  
 169 been discontinued on day -1 with once weekly intravitreal anti-viral injection ongoing at the  
 170 time of sample collection. Since acute GvHD significantly increases chances of developing  
 171 chronic GvHD we decided to exclude patients that may have had sub-clinical undiagnosed acute  
 172 that later went on to develop cGvHD. Thus, we selected our “No GvHD” patient based on the  
 173 fact that at 3 years post HSCT this patient showed no signs of cGvHD.

174

175 *Human scRNAseq sample preparation and sequencing*

176 Frozen PBMC samples were thawed rapidly for 90 s at 37 °C, slowly resuspended in RPMI  
 177 supplemented with 5% fetal bovine serum and immediately put on ice. Cells were spun at 300 rcf  
 178 for 10 min, resuspended in 1 ml RBC lysis buffer (Thermo Fisher Scientific, #00-4333-57) and  
 179 incubated at room temperature for 5 min. Following lysis, cells were washed twice to remove  
 180 ambient contaminating mRNA, reduced to a volume of 100 µl and viability was assessed using a  
 181 LunaFL cell counter (Logos Biosystems). Viability for both samples was >90%. Initial sample  
 182 processing for 10X single cell sequencing was performed analogous to the mouse samples as  
 183 described above. Three NextSeq runs and one MiSeq runs were performed and the standard 10X  
 184 Genomics cellranger (version 3.0.2.) pipeline was used to extract FASTQ files and perform data  
 185 processing. Sequenced reads were aligned to the human GRCh38 reference sequence provided  
 186 by 10X Genomics (refdata-cellranger-GRCh38 3.0.0.0).

187

188 Analogous to the mouse data set, Seurat (v3.1.1) was used for the downstream analysis following  
 189 the vignette for the analysis of an integrated dataset. Briefly, both samples were first filtered for  
 190 cells containing at least 200 and less than 4000 features as well as a mitochondrial and ribosomal  
 191 gene content less than 15% and 25%, respectively. Samples were normalized and variable genes  
 192 identified using the FindVariableFeatures function with nfeatures limited to 2000. Both samples  
 193 were integrated, scaled and principal components were calculated. Clustering was performed  
 194 using UMAP with the first 20 dimensions and a resolution of 0.5. Conserved markers between  
 195 each cluster for both samples were identified using the FindConservedMarker function and  
 196 cluster identities were assigned based on previously published marker genes in combination with  
 197 the web-based tool Enrichr (<https://amp.pharm.mssm.edu/Enrichr/>). Differentially expressed  
 198 genes of the no GvHD vs. pre-GvHD sample were calculated using the FindMarker function.

199 The R package EnhancedVolcano was used to generate the volcano plots based on the  
 200 differential gene expression within a cluster. Module scores were described as above using the  
 201 human gene homologs for each gene set.

202  
 203

Supplementary Table 4: Human scRNAseq output metrics summary

| Sample   | Estimated Number of Cells | Mean Reads per Cell | Median Genes per Cell | Sequencing Saturation | Total Genes Detected | Median UMI Counts per Cell |
|----------|---------------------------|---------------------|-----------------------|-----------------------|----------------------|----------------------------|
| No GvHD  | 6,830                     | 66,564              | 1,593                 | 84.10%                | 19,734               | 4,289                      |
| Pre-GvHD | 5,219                     | 62,829              | 1,468                 | 83.20%                | 18,625               | 4,272                      |

204  
 205  
 206  
 207  
 208  
 209  
 210  
 211  
 212  
 213  
 214  
 215  
 216  
 217  
 218  
 219  
 220  
 221  
 222  
 223  
 224

- 1 Bolger, A. M., Lohse, M. & Usadel, B. Trimmomatic: a flexible trimmer for Illumina sequence data. *Bioinformatics* **30**, 2114-2120 (2014).
- 2 Dobin, A. *et al.* STAR: ultrafast universal RNA-seq aligner. *Bioinformatics* **29**, 15-21 (2013).
- 3 Li, B. & Dewey, C. N. RSEM: accurate transcript quantification from RNA-Seq data with or without a reference genome. *BMC Bioinformatics* **12**, 323 (2011).
- 4 Phipson, B., Lee, S., Majewski, I. J., Alexander, W. S. & Smyth, G. K. Robust Hyperparameter Estimation Protects against Hypervariable Genes and Improves Power to Detect Differential Expression. *Ann Appl Stat* **10**, 946-963 (2016).
- 5 Butler, A., Hoffman, P., Smibert, P., Papalexi, E. & Satija, R. Integrating single-cell transcriptomic data across different conditions, technologies, and species. *Nat Biotechnol* **36**, 411-420 (2018).
- 6 Ciucci, T. *et al.* The Emergence and Functional Fitness of Memory CD4(+) T Cells Require the Transcription Factor Thpok. *Immunity* **50**, 91-105 e104 (2019).



225 **Supplemental Figures**  
226  
227

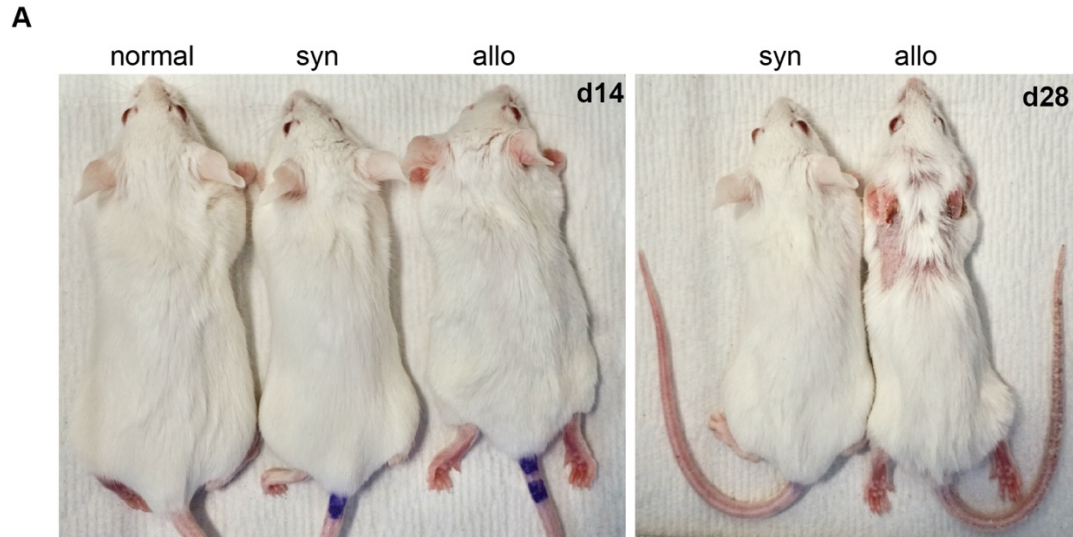

228  
229 **Supplemental Figure 1. Physical appearance of mice in the B10.D2 → BALB/c chronic**

230 **GvHD model. A)** Representative examples of mice on d14 (left) and d28 (right) after bone  
231 marrow transplantation. The normal mouse is of the same age but did receive neither irradiation  
232 nor a bone marrow transplant.

233



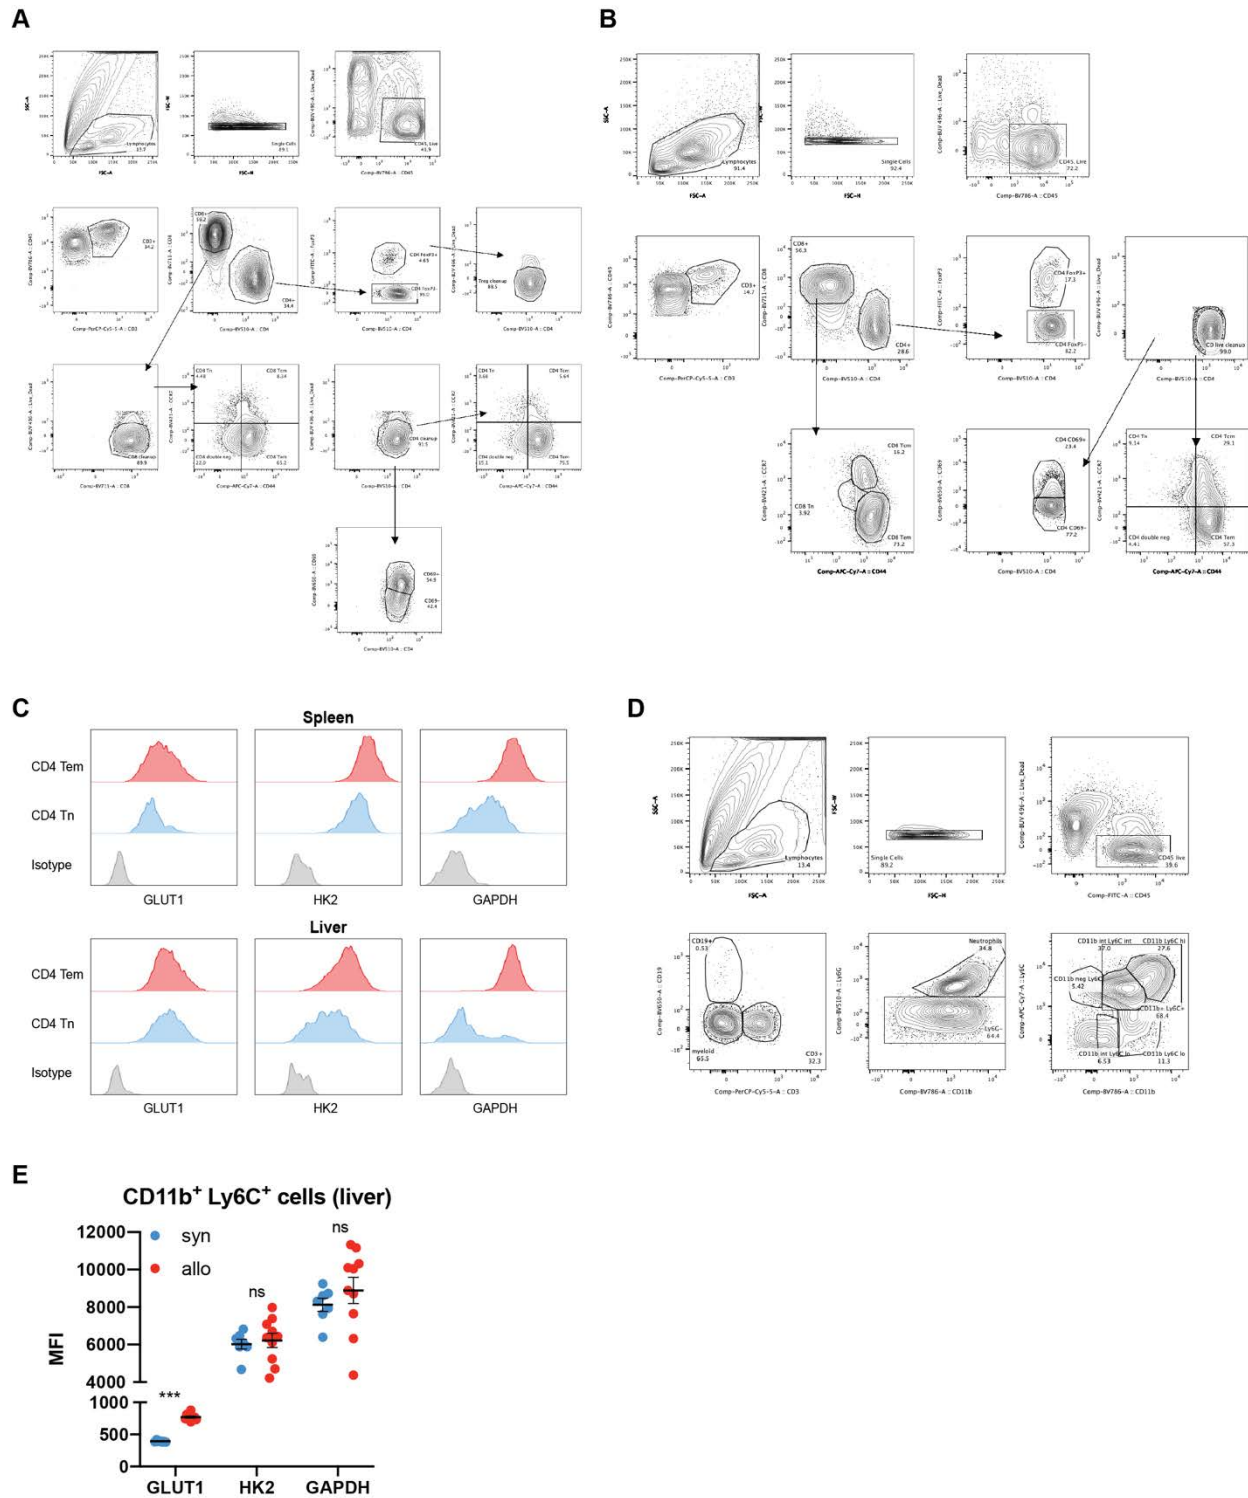

234

235

236

**Supplementary Figure 2. Flow cytometry gating strategy and representative examples of**

237

**MFI results.** Flow cytometry gating strategies to quantify the MFI for GLUT1, HK2 and

238

GAPDH in T cell subsets isolated from **A**) the spleen and **B**) the liver of syngeneic and

239 allogeneic animals on day 14 post-transplant. **C)** Representative examples of median  
240 fluorescence intensities in naïve and effector-memory CD4 T cells for GLUT1, HK2, and  
241 GAPDH. **D)** Gating strategy to quantify the MFI in monocytes/macrophages isolated from the  
242 liver of syngeneic and allogeneic animals on day 14 post-transplant. **E)** Quantification of MFI-  
243 based protein expression of GLUT1, HK2 and GAPDH in CD45<sup>+</sup>CD11b<sup>+</sup>LY6G<sup>-</sup>Ly6C<sup>+</sup> cells.  
244 Data displayed as mean  $\pm$  SEM. Welch's ANOVA with Dunnet's T3 multiple comparison test, n  
245 =7 (syn) / 10 (allo).

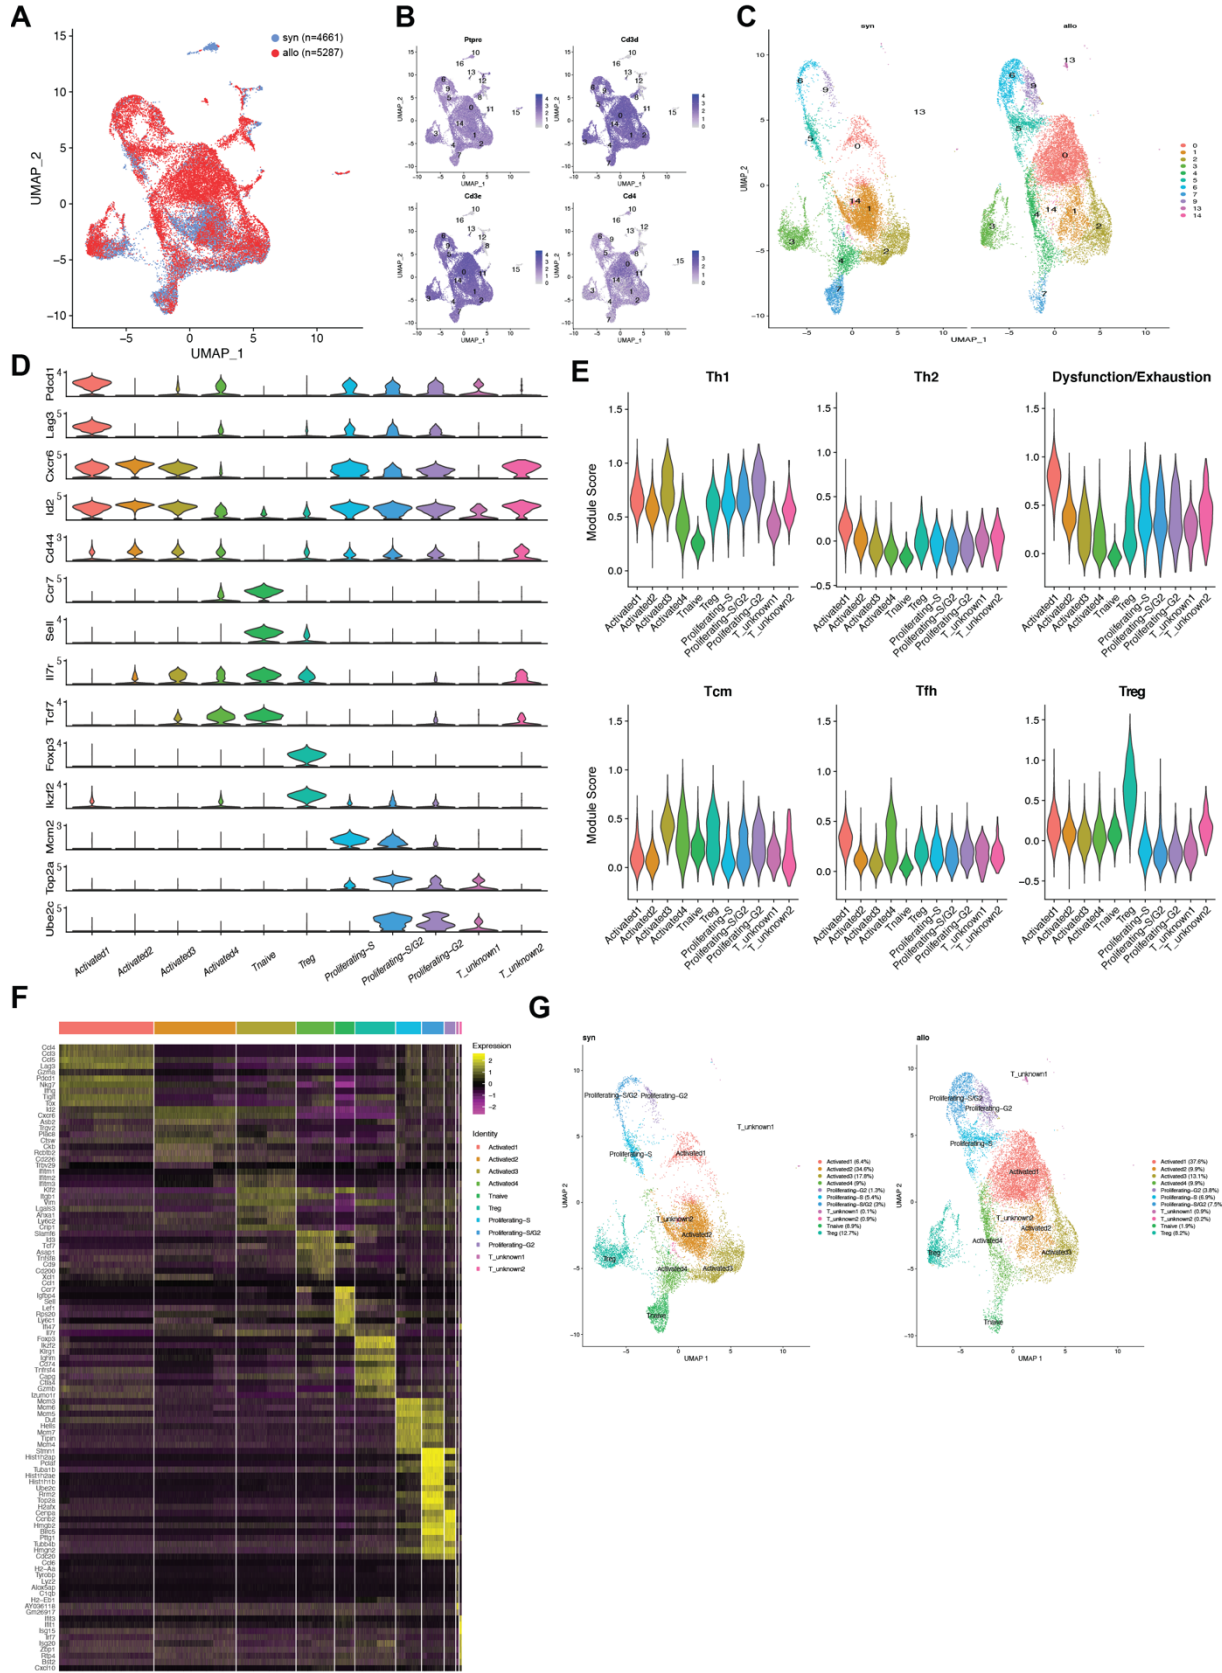

247 **Supplementary Figure 3. Single-cell RNA sequencing of CD45<sup>+</sup> CD4<sup>+</sup> cells from the liver on**  
 248 **day14 post-transplant. A)** CD45<sup>+</sup> CD4<sup>+</sup> cells were isolated from the liver of syngeneic (n=3)  
 249 and allogeneic animals (n=3) on day 14 post-transplant via FACS and processed separately using  
 250 the 10X Genomics 5' sequencing kit. For the analysis, syngeneic and allogeneic replicates were  
 251 merged, ultimately yielding 4661 (syn) and 5287 (allo) cells that were used for downstream  
 252 analysis. **B, C)** Dimensional reduction resulted in 16 clusters, 11 of which expressed Cd3d, Cd3g  
 253 and Cd4 and were therefore selected for further analysis. **D)** Overview of key marker expression  
 254 across clusters used to assign cluster identities. **E)** Module scores for the indicated T cell  
 255 subtypes as described in part by Ciucci et al., 2019. **F)** Top 10 conserved markers for each  
 256 cluster. **G)** Assigned identities and cell frequencies for each cluster in syn (left) and allogeneic  
 257 (right) animals.

258  
 259  
 260

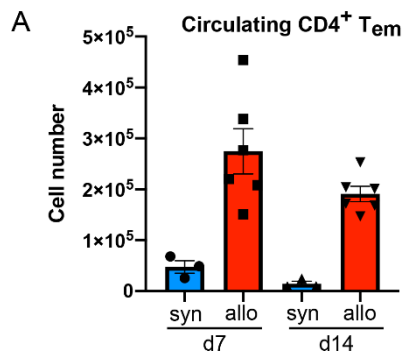

261  
 262

263 **Supplemental Figure 4. Circulating T<sub>em</sub> cells at early timepoints post-HSCT.** To quantify  
 264 circulating CD4<sup>+</sup> T<sub>n</sub> and T<sub>em</sub>, blood was drawn via cardiac puncture into heparin-coated tubes,  
 265 red blood cells were lysed, and the remaining cells were stained with antibodies against CD4,  
 266 CD44, CCR7, CD25, FOXP3 and CD69 (T<sub>em</sub> defined as CD4<sup>+</sup>, FOXP3<sup>-</sup>, CCR7<sup>-</sup>, CD44<sup>high</sup>), n =  
 267 3-6, all data shown as mean ± SEM.

268

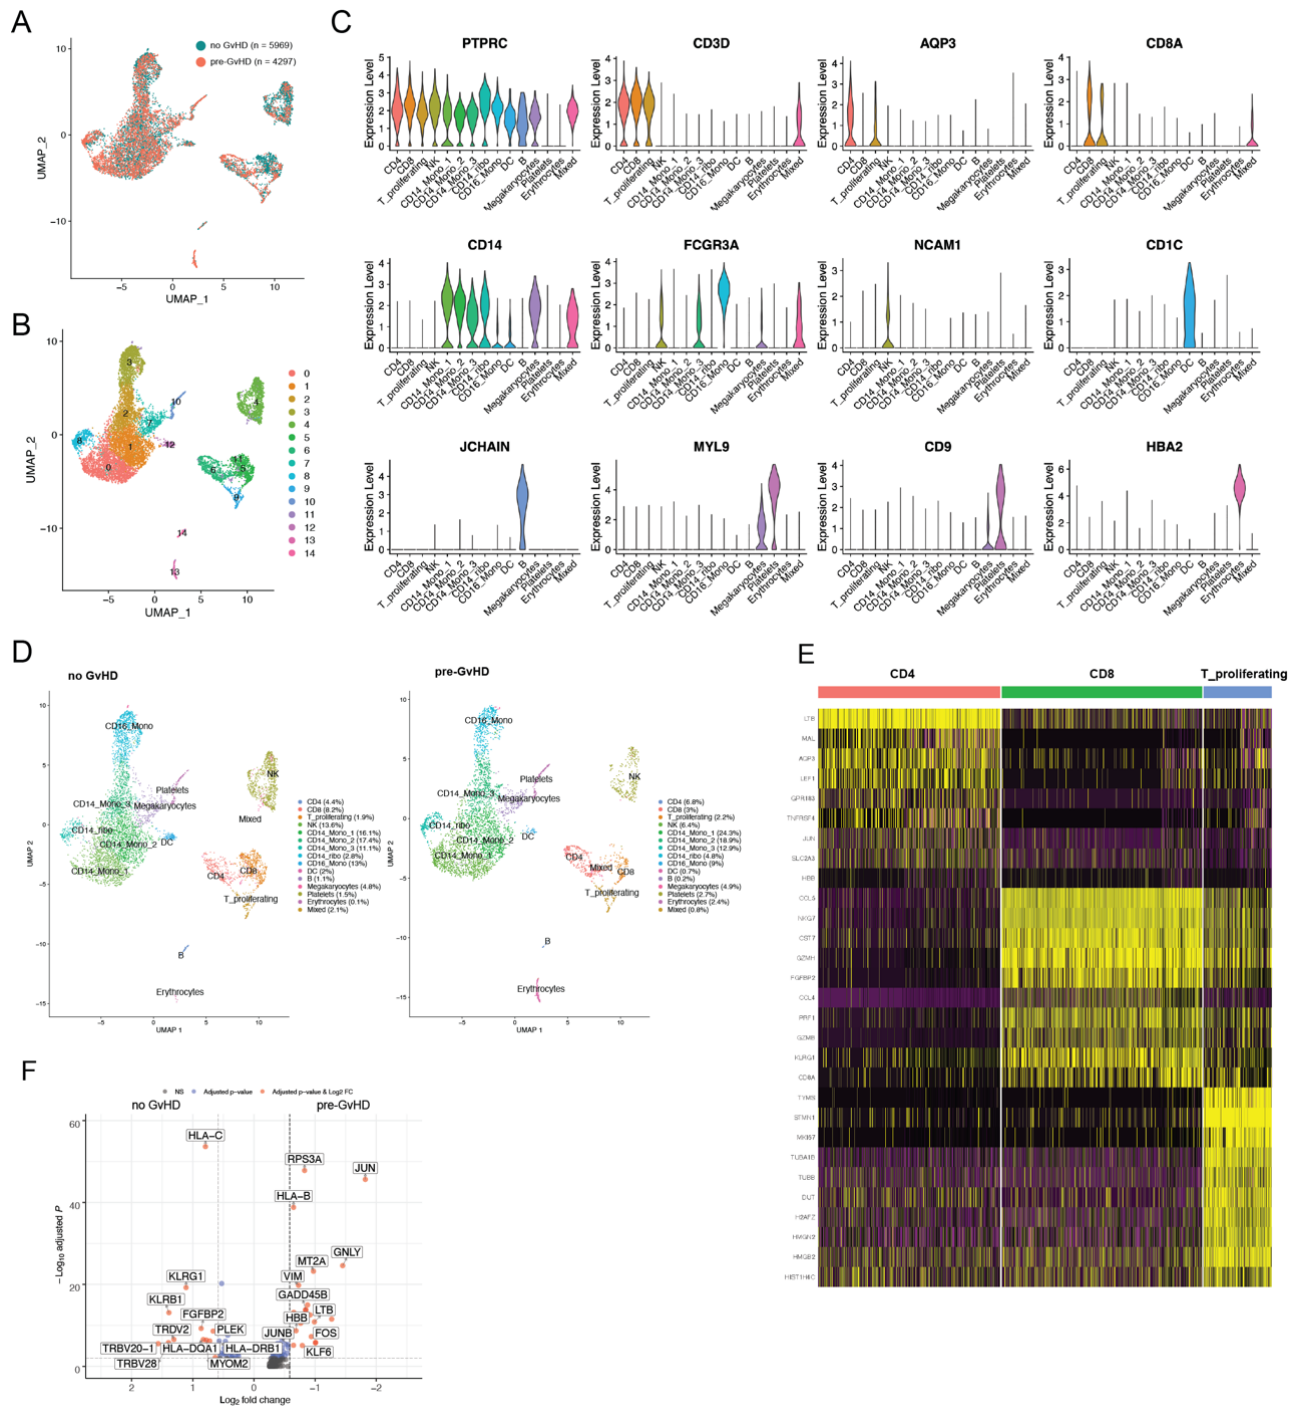

269

270 **Supplemental Figure 5. Identification of cluster identities in the human PBMC single cell**  
 271 **RNA sequencing dataset. A)** UMAP visualization of the “no GvHD” and “pre-GvHD” samples  
 272 and the total cell number that went into the analysis. **B)** Clustering result of the integrated data  
 273 set yielding 14 separate clusters. **C)** Gene expression of known PBMC markers used to assign

274 cluster identities. **D)** UMAP visualization of assigned cluster identities for both samples with the  
275 cluster frequency indicated for each cell type. **E)** Heatmap illustrating the top 10 conserved  
276 genes for each of the three identified T cell clusters. **F)** Volcano plot of the differential gene  
277 expression within the CD8 T cell cluster comparing the no GvHD vs. pre-GvHD sample. Genes  
278 with a fold-change  $>1.5$  and adjusted p-value  $<0.01$  are labeled and highlighted in red.  
279
